# Supplementary material
Source: PubMed Central journal article supplement (PMC4281018)
Supplement: NIHMS647186-supplement-Fig_S3.pdf [file NIHMS647186-supplement-Fig_S3.pdf]

(analysis continued from MT plus tip tracking, fig. S2)

#### 4) Interpenetration analysis for a single aster-aster interaction zone (AAIZ)

- Divide comets (summed over 2 min) into two populations based on direction.
- Divide space into binned rectangular ROIs perpendicular to interaction zone.
- Determine population fractions. (Example data for ROI6)

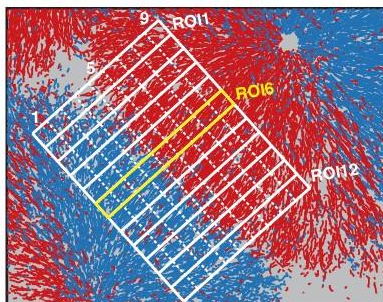

| Bin No. | Number of EB1 comets |      |     |        |
|---------|----------------------|------|-----|--------|
|         | Total                | Blue | Red | % Blue |
| 1       | 265                  | 240  | 25  | 90.6   |
| 2       | 279                  | 250  | 29  | 89.6   |
| 3       | 308                  | 278  | 30  | 90.3   |
| 4       | 351                  | 281  | 70  | 80.1   |
| 5       | 282                  | 41   | 241 | 14.5   |
| 6       | 268                  | 10   | 258 | 3.7    |
| 7       | 255                  | 30   | 225 | 11.8   |
| 8       | 265                  | 22   | 243 | 8.3    |
| 9       | 301                  | 6    | 295 | 2.0    |

- Plot population fractions over distance for all ROIs.
- Remove outlier ROIs (1 & 2).

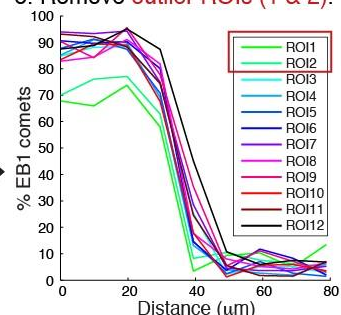

#### 5) Interpenetration analysis for multiple AAIZs

**Control** (n = 52 ROIs from 6 zones)

**AurkB inhibition** (n = 55 ROIs from 5 zones)

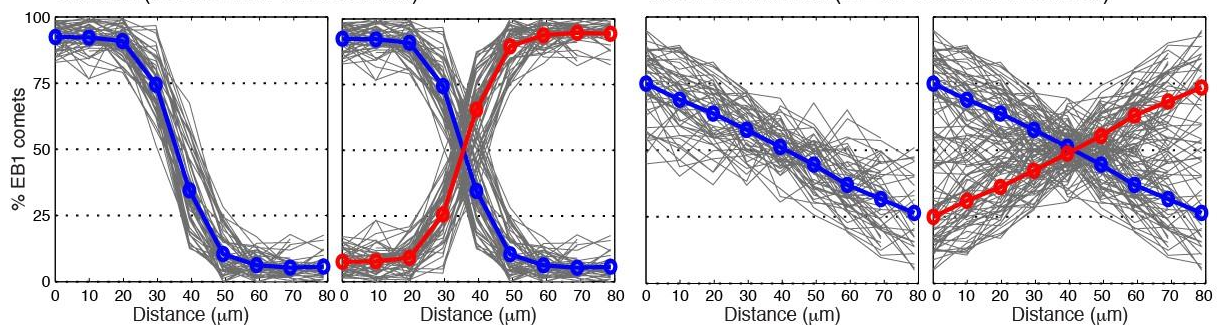

Gray lines -- population fraction data associated with each ROI.

Blue line -- mean fraction of "blue" comets.

Red line -- mean fraction of "red" comets, corresponding to (1 - Blue Fraction).

Same data are displayed in Figure 1F with standard deviation represented by shaded area.

**Fig. S3. Aster-aster interpenetration analysis based on tracked microtubule plus ends.** See Supplementary Methods section "Aster-Aster Interpenetration Analysis" for description.
