# Supplementary material
Source: PubMed Central journal article supplement (PMC4281018)
Supplement: NIHMS647186-supplement-Fig_S6.pdf [file NIHMS647186-supplement-Fig_S6.pdf]

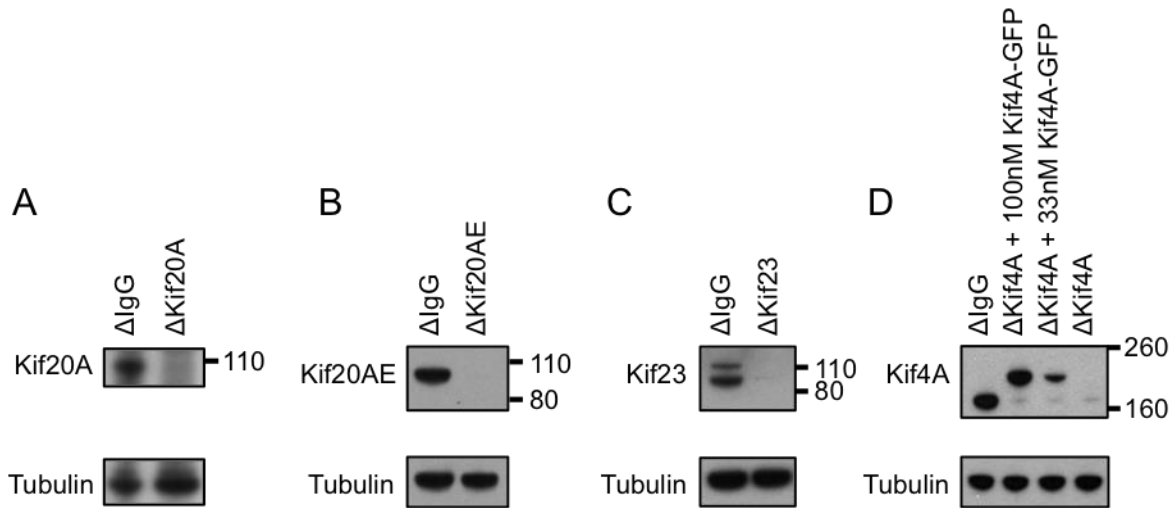

**Fig. S6. Immunoblots showing immunodepletion of *Xenopus laevis* kinesin candidates.** (A) Kif20A (Mklp2 or Rabkinesin-6, ~101 kD). (B) Kif20AE (~88 kD), an embryonic paralog of Kif20A in *Xenopus*. (C) Kif23 (Mklp1, a subunit of Centralspindlin complex, ~90 kD). (D) Kif4A (~139 kD) depletion was rescued by adding back 100nM recombinant Kif4A-GFP (~168 kD).
