# Supplementary material
Source: PubMed Central journal article supplement (PMC4281018)
Supplement: NIHMS647186-supplement-Fig_S7.pdf [file NIHMS647186-supplement-Fig_S7.pdf]

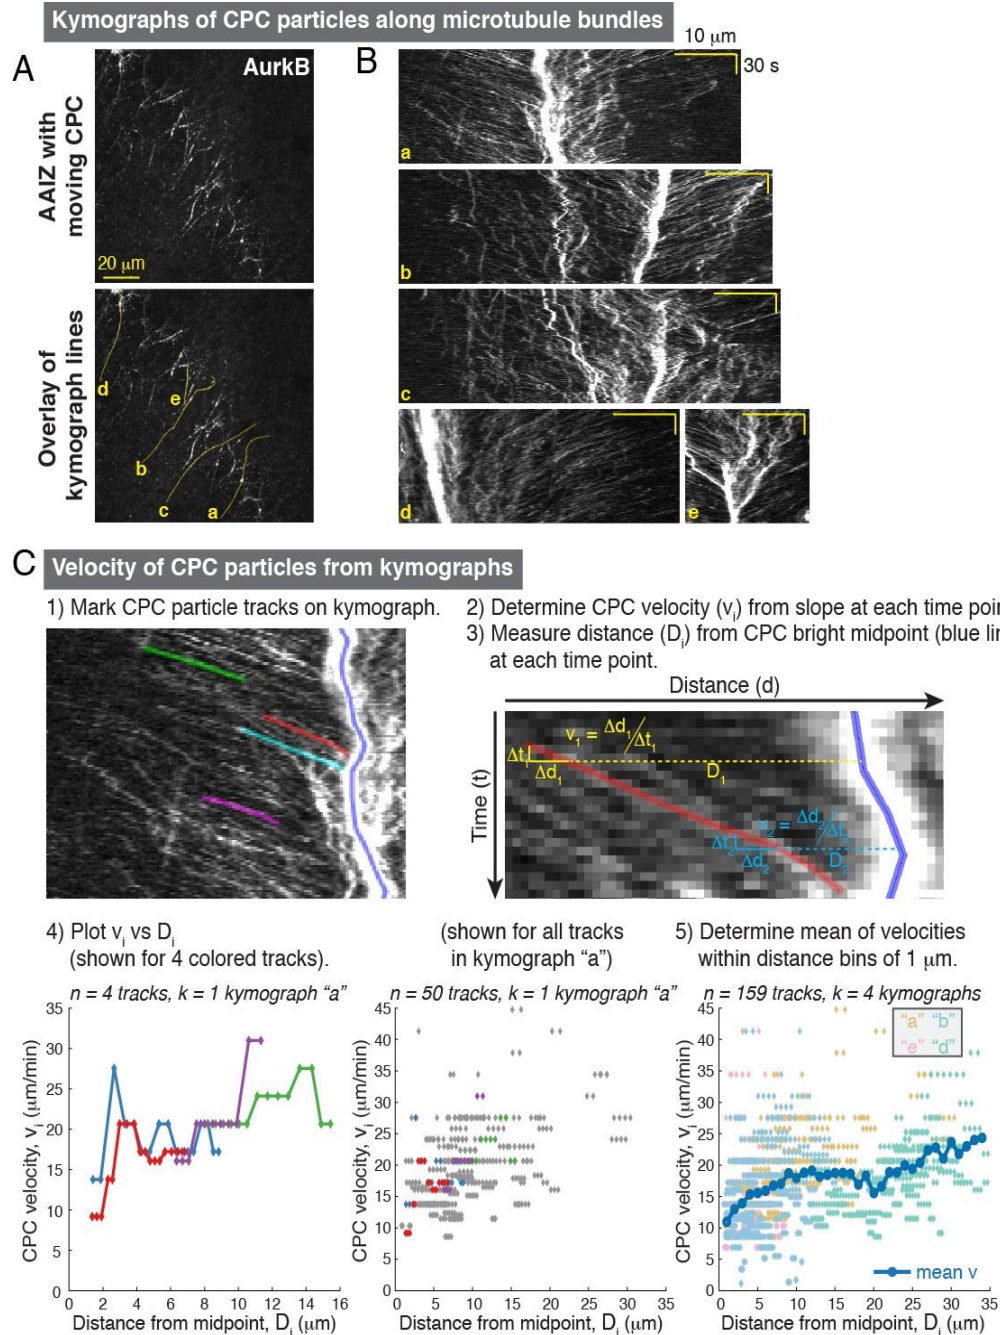

**Fig. S7. Measuring velocity of directed CPC movement on the antiparallel microtubule overlaps at the aster-aster interaction zones (AAIZs).** (A) Spinning disc confocal image of CPC visualized with Alexa647-labeled antibody against AurkB at an AAIZ at the beginning of a time-lapse sequence (top). Segmented lines for kymographs are overlaid in yellow (bottom). (B) Kymographs generated from the time-lapse (total duration of 170 sec with 1.43 sec intervals) corresponding to lines (a-e) in (A). (C) Procedure for obtaining CPC velocity as a function of distance from the CPC bright midpoint. See Supplementary Methods section "Velocity Measurements for CPC Movement" for more detailed description.
