# Supplementary material
Source: PubMed Central journal article supplement (PMC4281018)
Supplement: NIHMS647186-supplement-Fig_S8.pdf [file NIHMS647186-supplement-Fig_S8.pdf]

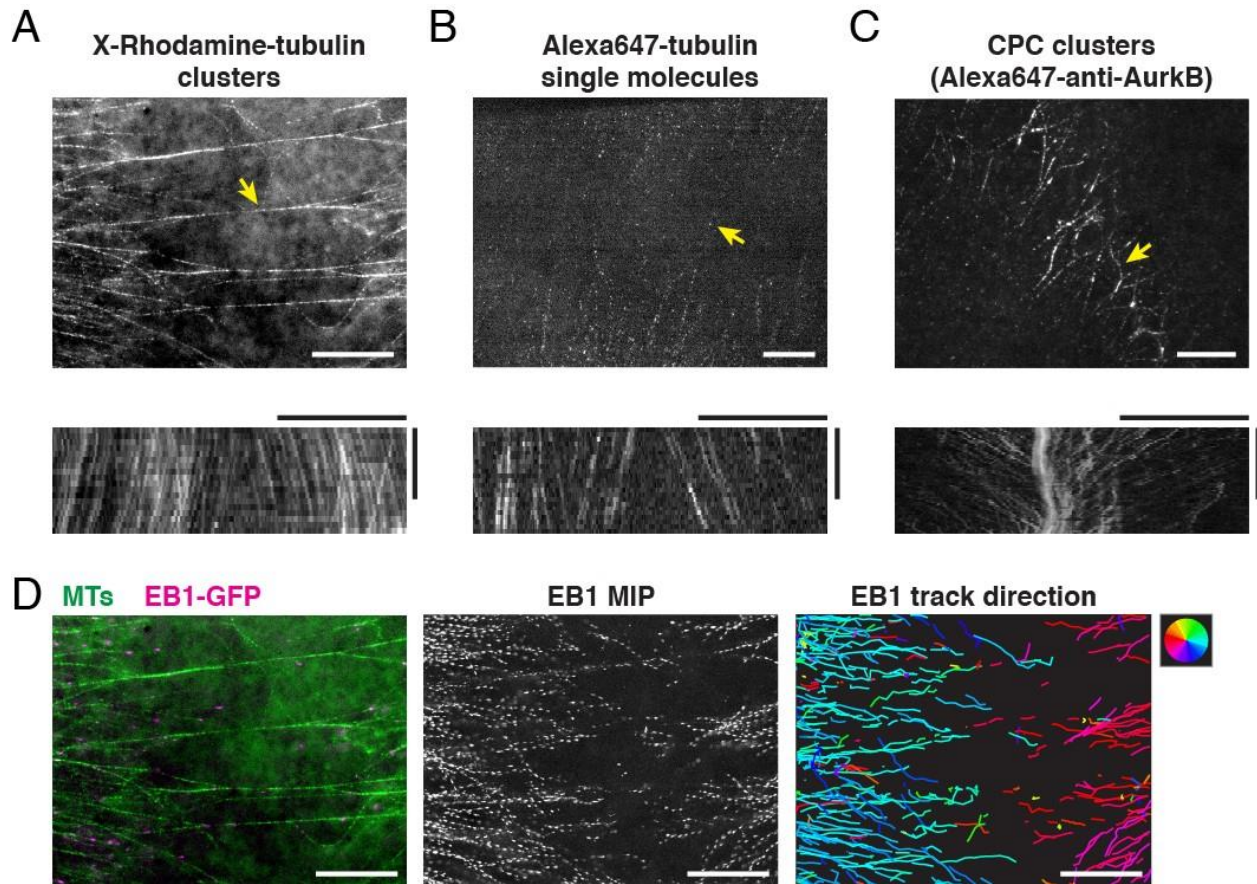

**Fig. S8. Tubulin speckle imaging shows antiparallel microtubules sliding outward from overlap center.** (A) Tubulin speckles were formed by uneven incorporation of the relatively hydrophobic X-rhodamine-tubulin into microtubules. The movement of these X-rhodamine tubulin clusters was imaged with time-lapse widefield microscopy at 5 sec intervals (movie S6). (B) Tubulin speckles were formed by single-molecule level incorporation of Alexa647-tubulin into microtubules. Time-lapse spinning disc confocal images were taken at 4 sec intervals (movie S8). (C) CPC clusters were visualized using Alexa647-IgG against AurkB and imaged with time-lapse spinning disc confocal microscopy at 1.3 sec intervals (same data as shown in fig. S7A, movie S4). (A-C) Still images from each time-lapse sequence (*top*). Kymographs along the MT overlap bundles indicated by yellow arrow (*bottom*). Horizontal bars, 20  $\mu\text{m}$ . Vertical bars, 1

min. Kymographs show that while microtubules slide slowly outwards from the overlap centers at  $<5 \mu\text{m}/\text{min}$ , CPC clusters move inwards at  $10\text{-}25 \mu\text{m}/\text{min}$  towards overlap center. This confirms that the fast inwards movement of the CPC is indeed motor-driven transport along microtubules. (D) Overlay of EB1-GFP image (magenta) on tubulin image (green) shown in (A); a still image from movie S7 (*left*). Maximum intensity projection of EB1 images (*middle*), and EB1 tracks colored by their mean direction (*right*) over the first half (2.5 min) of movie S7. Movie 7 illustrates the relationship between microtubule plus end growth (i.e. EB1 comet movement) and formation of antiparallel bundles. Horizontal bars, 20  $\mu\text{m}$ .
