# Supplementary material
Source: PubMed Central journal article supplement (PMC4281018)
Supplement: NIHMS647186-supplement-Fig_S12.pdf [file NIHMS647186-supplement-Fig_S12.pdf]

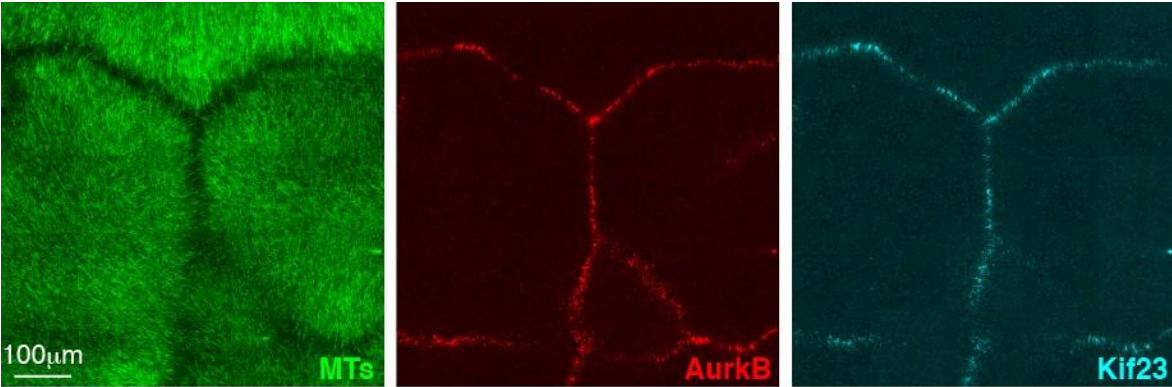

**Fig. S12. The CPC and Centralspindlin complexes co-localize at AAIZs on model plasma membranes.** Experimental setup as per Fig. 3A. TIRF images from 5x5 adjacent fields were corrected for uneven illumination and stitched (5). Microtubules (green), CPC (AurkB, red), Centralspindlin (Kif23, cyan).
