# Supplementary material
Source: PubMed Central journal article supplement (PMC4281018)
Supplement: NIHMS647186-supplement-Fig_S13.pdf [file NIHMS647186-supplement-Fig_S13.pdf]

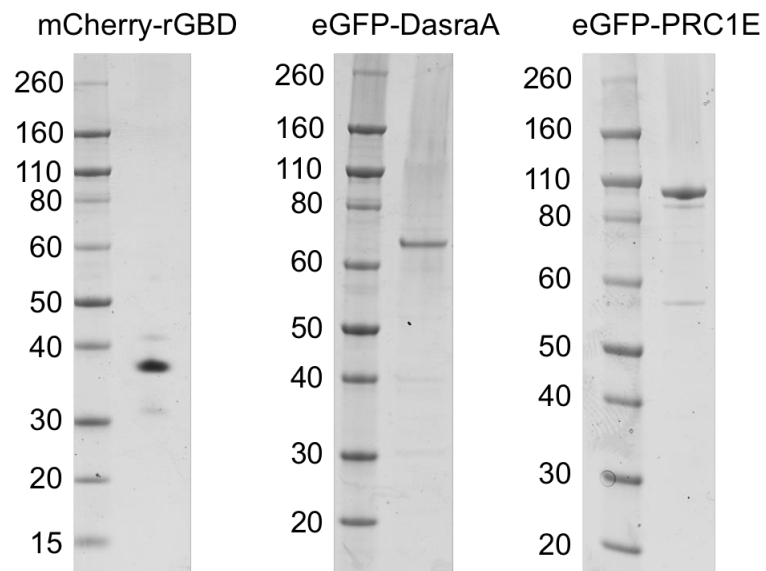

**Fig. S13. Coomassie-stained SDS gels of purified proteins with cloning and purification methods established in this study.** Theoretical molecular weights of the protein constructs are: 39 kD (mCherry-rGBD), 61 kD (eGFP-DasraA), and 96 kD (eGFP-PRC1E).
