# Supplementary material
Source: PubMed Central journal article supplement (PMC4281018)
Supplement: NIHMS647186-supplement-Table_S1.pdf [file NIHMS647186-supplement-Table_S1.pdf]

**Table S1.**

List of *Xenopus laevis* protein sequences studied in this paper.

| <b>Name</b> | <b>Description/Alternate names</b>                        | <b>NCBI GI number</b>              |
|-------------|-----------------------------------------------------------|------------------------------------|
| AurkA       | Aurora kinase A                                           | 148236543                          |
| AurkB       | Aurora kinase B                                           | 147899288                          |
| DasraA      | Borealin-2                                                | 148232132                          |
| PRC1E       | Embryonic paralog of PRC1<br>(42% identity by sequence)   | 148231955                          |
| Kif4A       | Chromokinesin, Xklp1                                      | 18202613                           |
| Kif20A      | Mklp2, Rabkinesin-6                                       | 147902220                          |
| Kif20AE     | Embryonic paralog of Kif20A<br>(41% identity by sequence) | 169642006<br>(starting at "MDSRN") |
| Kif23       | Mklp1, CHO1                                               | 148222381                          |
