# Supplementary material
Source: PubMed Central journal article supplement (PMC4281018)
Supplement: NIHMS647186-supplement-Table_S2.pdf [file NIHMS647186-supplement-Table_S2.pdf]

**Table S2.**

Parameters for automated detection and tracking of EB1 comets using *plusTipTracker* (25).

| Image sequence calibrations |                      | Tracking parameters      |          |
|-----------------------------|----------------------|--------------------------|----------|
| Pixel size                  | 0.3284 $\mu\text{m}$ | Maximum gap length       | 2 frames |
| Frame rate                  | 1.5 s                | Minimum sub-track length | 3 frames |
|                             |                      | Minimum search radius    | 1 pixel  |
| Detection parameters        |                      | Maximum search radius    | 3 pixels |
| Method                      | Watershed-based      | Maximum forward angle    | 30°      |
| Sigma 1                     | 1                    | Minimum forward angle    | 10°      |
| Sigma 2                     | 7                    | Fluctuation radius       | 1 pixel  |
| K                           | 1-2.5                | Maximum shrinkage factor | 1        |
